# Supplementary material
Source: PubMed Central journal article supplement (PMC6779357)
Supplement: ASN.2019020111SupplementaryData.pdf [file ASN.2019020111SupplementaryData.pdf]

## **Supplemental Material Table of Contents**

- **Supplemental Figure 1. Angiotensin (Ang) II induces KLF4 mRNA expression in M1-activated macrophages.**
- **Supplemental Figure 2. Normal renal architecture and function in KLF4 MKO sham controls.**
- **Supplemental Figure 3. mRNA expression for M1 and M2 markers in obstructed kidneys from WT and KLF4 MKO mice.**
- **Supplemental Figure 4. KLF4 deficiency in macrophages permits induction of M1 markers in macrophages infiltrating the NTN kidney.**
- **Supplemental Figure 5. Myeloid cell characterization in WT and KLF4 MKO kidneys during NTN.**
- **Supplemental Figure 6. Characterization of macrophages from WT and TNF MKO mice during NTN.**
- **Supplemental Figure 7. Normal renal architecture and function in TNF MKO sham controls.**
- **Supplemental Figure 8. Renal RIPK3 and MLKL protein levels in WT and KLF4 MKO sham controls.**

## Supplemental Material

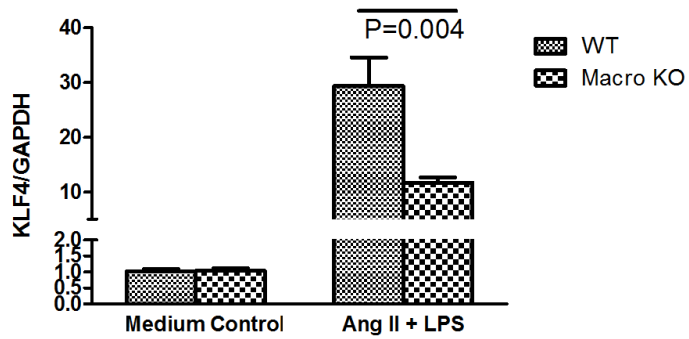

**Supplemental Figure 1. Angiotensin (Ang) II induces KLF4 mRNA expression in M1-activated macrophages.** (“Macro KO” = peritoneal macrophages isolated from mice lacking type 1 angiotensin receptor in myeloid cells)

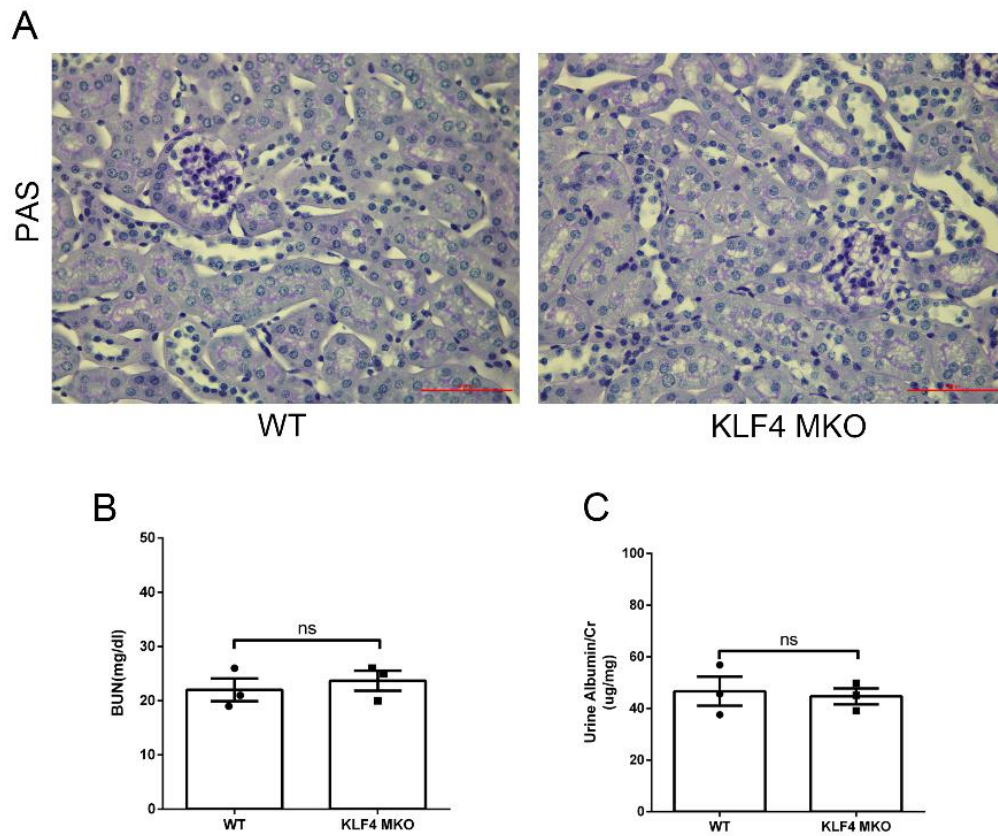

**Supplemental Figure 2. Normal renal architecture and function in KLF4 MKO sham controls.** (A) Representative kidney histology in sham control WT and KLF4 MKO kidneys. (B) BUN and (C) urine albumin/creatinine ratios (ACR) in sham control WT and KLF4 MKO mice (n=3 for WT and KLF4 MKO). Scale bar = 50  $\mu$ m. Data represent the mean $\pm$ SEM (ns, not significant).

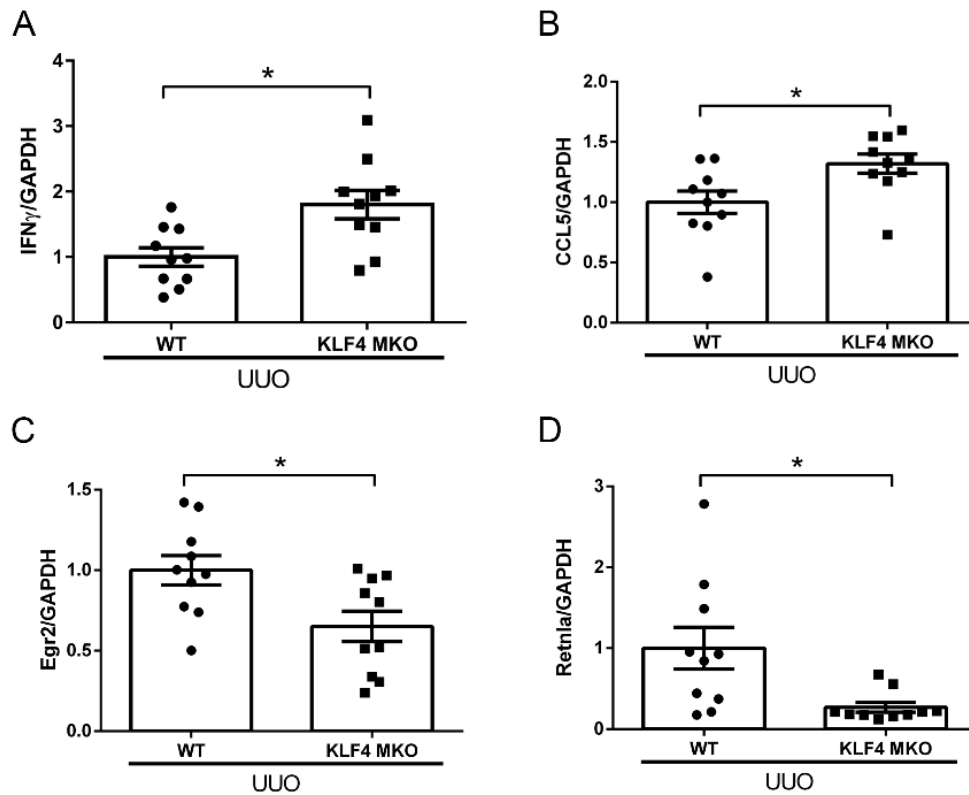

**Supplemental Figure 3. mRNA expression for M1 and M2 markers in obstructed kidneys from WT and KLF4 MKO mice.** (A-D) mRNA expression of (A) IFN $\gamma$ , (B) CCL5, (C) Egr2, (D) Retnla in WT and KLF4 MKO kidneys at day 7 of UUO (n=10 in each group). Data represent the mean $\pm$ SEM (\*  $P$ <0.05).

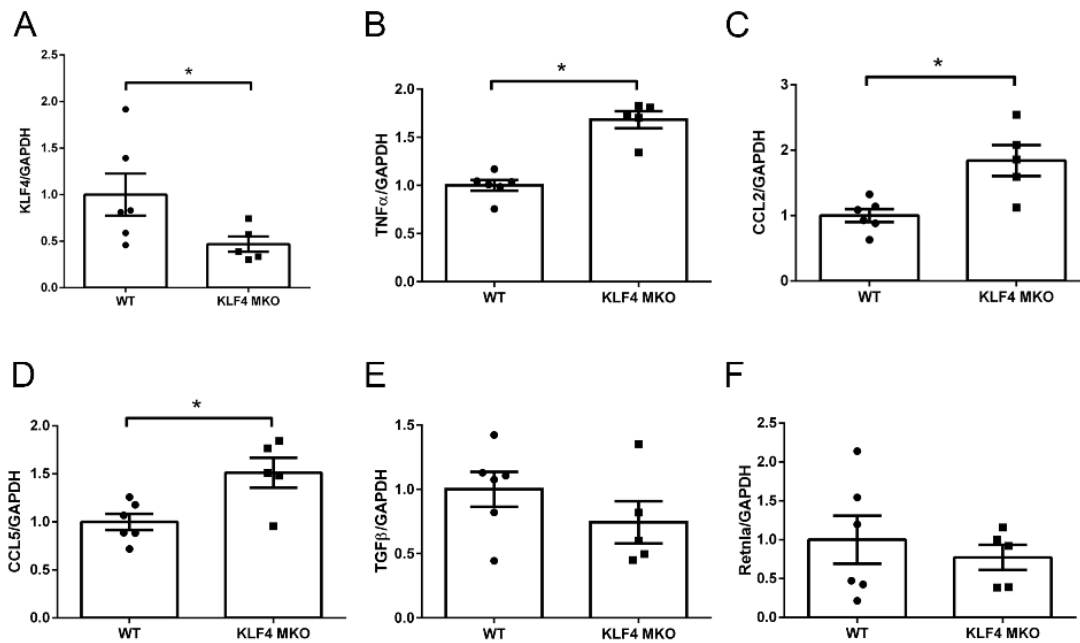

**Supplemental Figure 4. KLF4 deficiency in macrophages permits induction of M1 markers in macrophages infiltrating the NTN kidney.** (A-F) mRNA expression for (A) KLF4, (B) TNF $\alpha$ , (C) CCL2, (D) CCL5, (E) TGF $\beta$ , and (F) Retnla in CD11b<sup>+</sup>Ly6C<sup>hi</sup> macrophages sorted from NTN kidneys of WT and KLF4 MKO mice (n=6 for WT and n=5 for KLF4 MKO). Data represent the mean $\pm$ SEM (\*  $P$ <0.05).

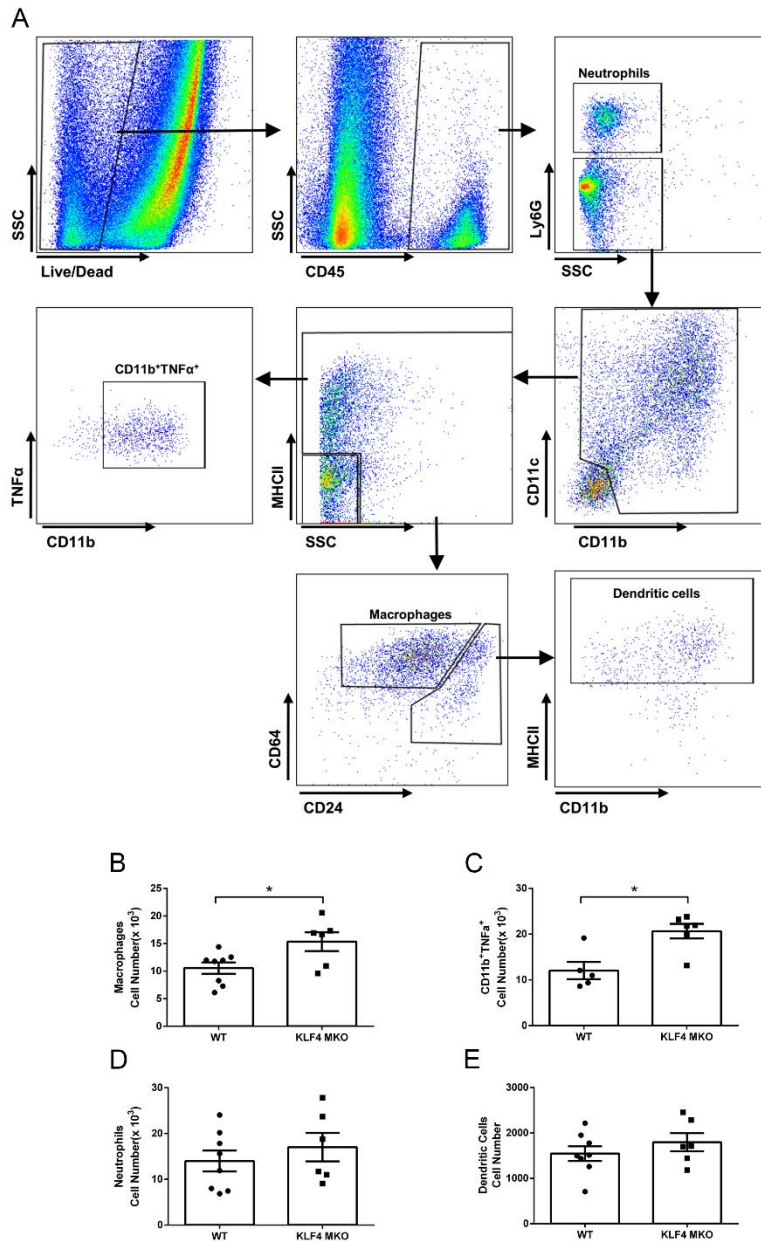

### Supplemental Figure 5. Myeloid cell characterization in WT and KLF4 MKO kidneys

**during NTN.** (A) Representative flow cytometry gating strategy for single cell suspensions from NTN kidneys. (B) Number of CD64<sup>+</sup> macrophages in kidneys from WT and KLF4 MKO mice at day 14 of NTN (n=8 for WT and n=6 for KLF4 MKO in NTN). (C) Number of CD11b<sup>+</sup> TNFα<sup>+</sup> myeloid cells in kidneys from WT and KLF4 MKO mice at day 14 of NTN (n=5 for WT and n=6 for KLF4 MKO in NTN). (D-E) Number of (D) neutrophils and dendritic cells in kidneys from WT and KLF4 MKO mice at day 14 of NTN (n=8 for WT and n=6 for KLF4 MKO). Data represent the mean±SEM (\* *P*<0.05).

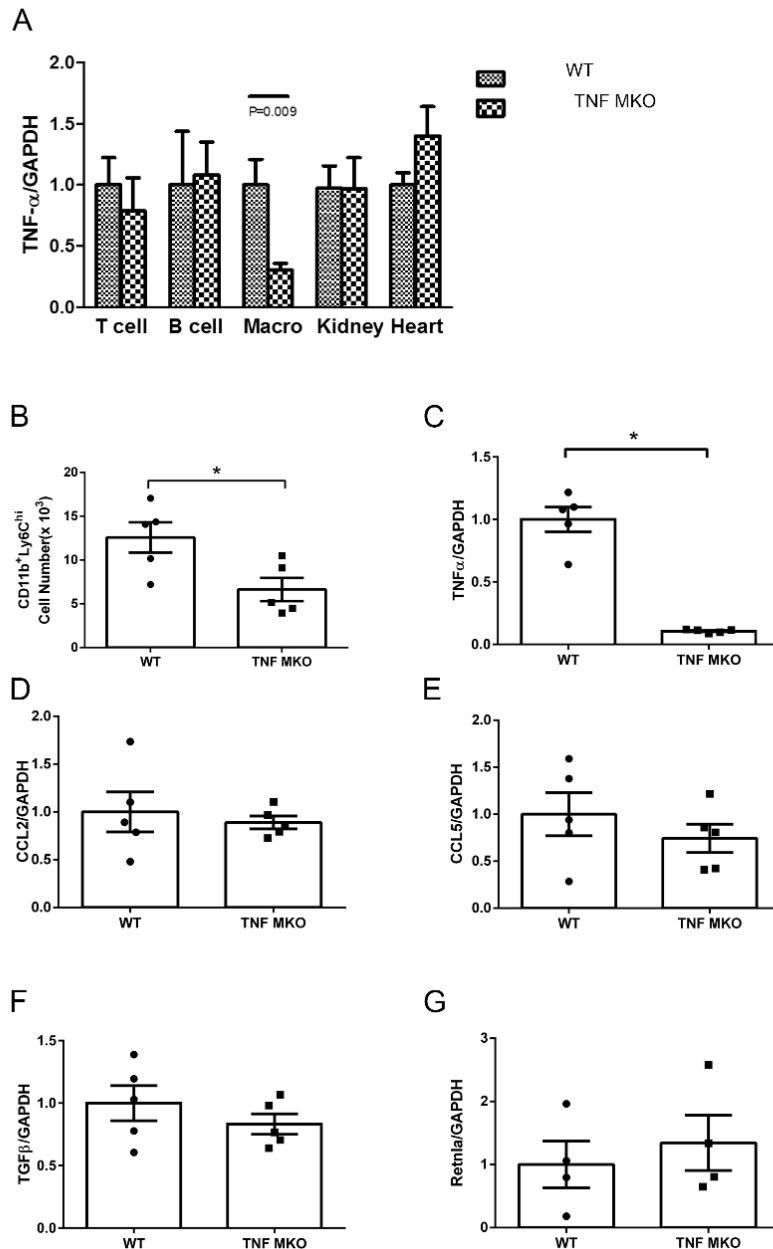

**Supplemental Figure 6. Characterization of macrophages from WT and TNF MKO mice during NTN.** (A) mRNA expression for TNF in isolated T cells, B cells, CD11b<sup>+</sup> splenic macrophages (Macro), and in whole kidney and heart from wildtype (WT) and LysM-Cre<sup>+</sup> TNF<sup>fl/fl</sup> (TNF MKO) mice (n $\geq$ 6 for each group). (B) Number of CD11b<sup>+</sup>Ly6C<sup>hi</sup> macrophages in kidneys from WT and TNF MKO mice at day 14 of NTN. (C-G) mRNA expression levels for (C) TNF $\alpha$ , (D) CCL2, (E) CCL5, (F) TGF $\beta$ , and (G) Retnla in CD11b<sup>+</sup>Ly6C<sup>hi</sup> macrophages sorted from NTN kidneys of WT and TNF MKO mice (n=5 for each group). Data represent the mean $\pm$ SEM (\*  $P<0.05$ ).

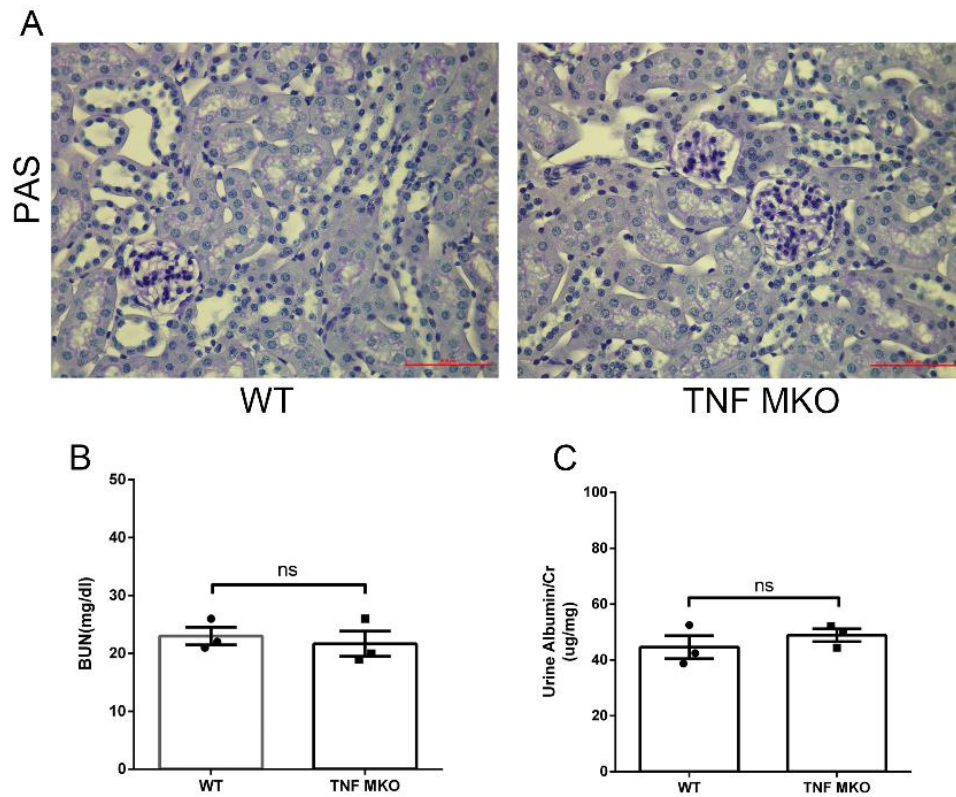

**Supplemental Figure 7. Normal renal architecture and function in TNF MKO sham controls.** (A) Renal pathology in sham control WT and TNF MKO kidneys. (B) BUN and (C) urine albumin/creatinine ratios (ACR) in sham control WT and TNF MKO mice (n=3 for WT and TNF MKO). Data represent the mean $\pm$ SEM (ns, not significant).

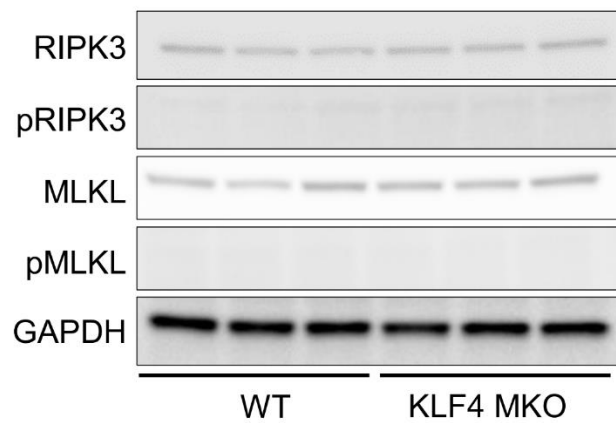

**Supplemental Figure 8. Renal RIPK3 and MLKL protein levels in WT and KLF4 MKO sham controls.** Western blots for whole and phosphorylated RIPK3 and MLKL protein in WT and KLF4 MKO sham control kidneys.
